# Supplementary material for: Study of Methane Emission and Geological Sources in Northeast China Permafrost Area Related to Engineering Construction and Climate Disturbance Based on Ground Monitoring and AIRS
Source: MDPI journal article supplement (doi:10.3390/atmos14081298), 2023-08-16
Supplement: s1 [file s1]

Archive with 1 entries (1 files):
- atmosphere-2503312-supplementary.pdf
